# Supplementary material for: Isothermal structural evolution of CL-20/HMX cocrystals under slow roasting at 190 °C
Source: Royal Society of Chemistry journal article supplement (doi:10.1039/d3cp01084h), 2023-01-01
Supplement: d3cp01084h1.pdf [file d3cp01084h1.pdf]

## Supporting Information

### Isothermal Structural Evolution of CL-20/HMX Cocrystals Under Slow Roasting at 190 °C

Wentao Liang<sup>a\*</sup>, Xiaoyu Sun<sup>b\*</sup>, He Wang<sup>a</sup>, Junke Wang<sup>a</sup>, Zhilei Sui<sup>c</sup>, Haichao Ren<sup>d</sup>, Rucheng Dai<sup>b</sup>,  
Xianxu Zheng<sup>c</sup>, Zhongping Wang<sup>b†</sup>, Xiaohui Duan<sup>e†</sup>, and Zengming Zhang<sup>b†</sup>

<sup>a</sup>Department of Physics, School of Physics Science, University of Science and Technology of China,  
Hefei, Anhui, 230026, China

<sup>b</sup> The Center for Physical Experiments, School of Physics Science, University of Science and  
Technology of China, Hefei, Anhui, 230026, China

<sup>c</sup> Institute of Fluid Physics, China Academy of Engineering Physics, Mianyang, Sichuan, 621900,  
China

<sup>d</sup> Xi'an Modern Chemistry Research Institute, Xi'an, Shanxi 710065, China

<sup>e</sup> Key Laboratory of friendly Energy Materials, Southwest University of Science and Technology,  
Mianyang, 621010, China

\* Coauthors: liangwt@mail.ustc.edu.cn and xysun2015@ustc.edu.cn

† Corresponding authors: zpwang@ustc.edu.cn, duanxiaohui@swust.edu.cn and zzm@ustc.edu.cn

Author Contributions: W. L. and X. S. contributed equally.

Figure S1. XRD patterns of CL-20/HMX cocrystals at different temperatures

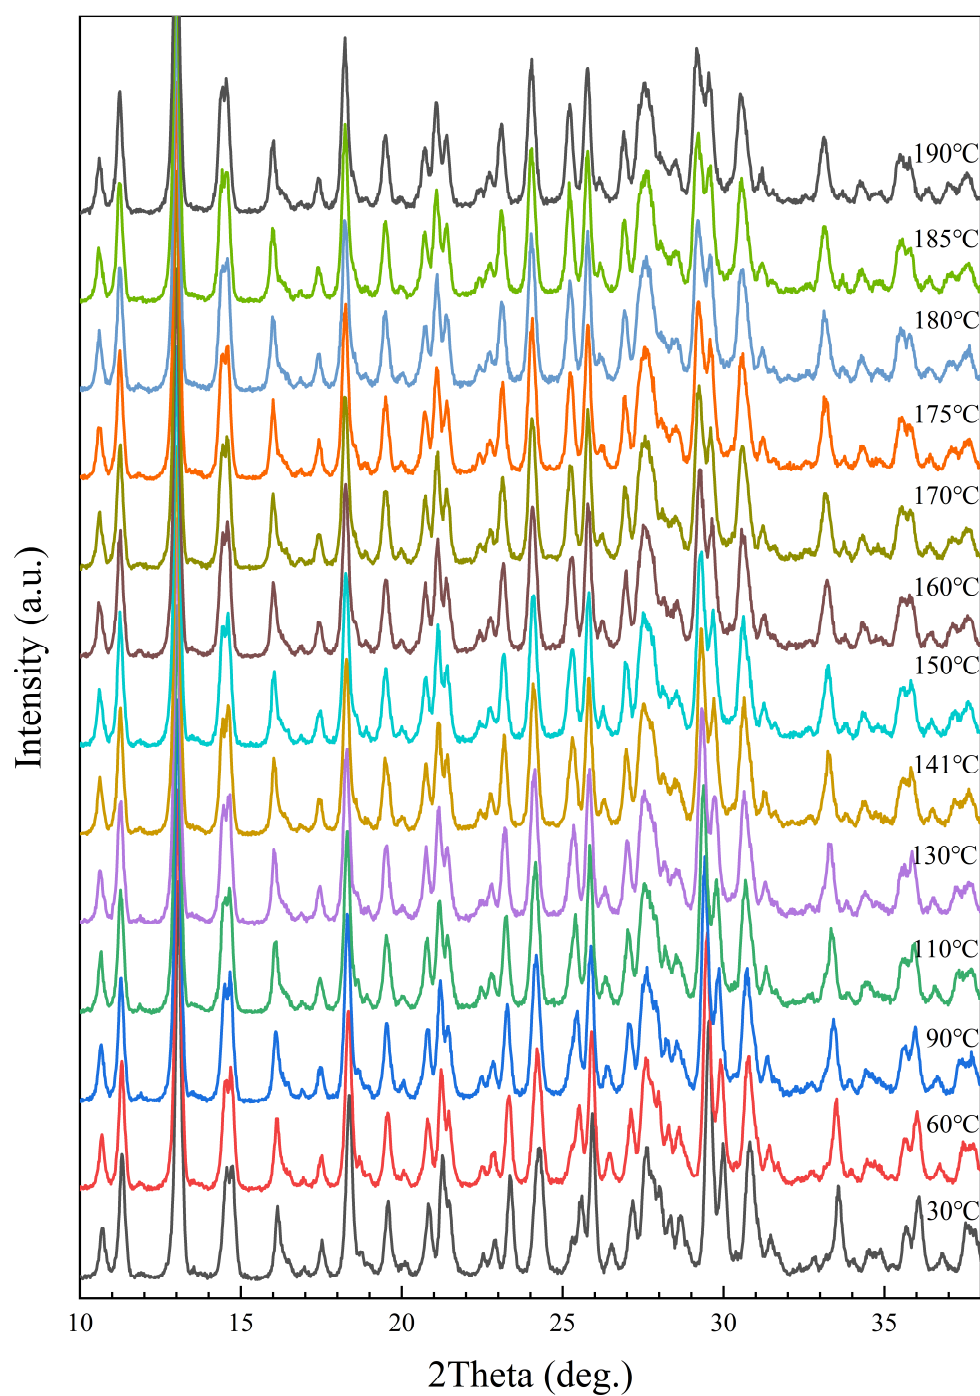

Figure S2. The Raman and IR spectra of CL-20/HMX cocrystals before and after long-term heating, pure CL-20 and  $\delta$ -HMX.

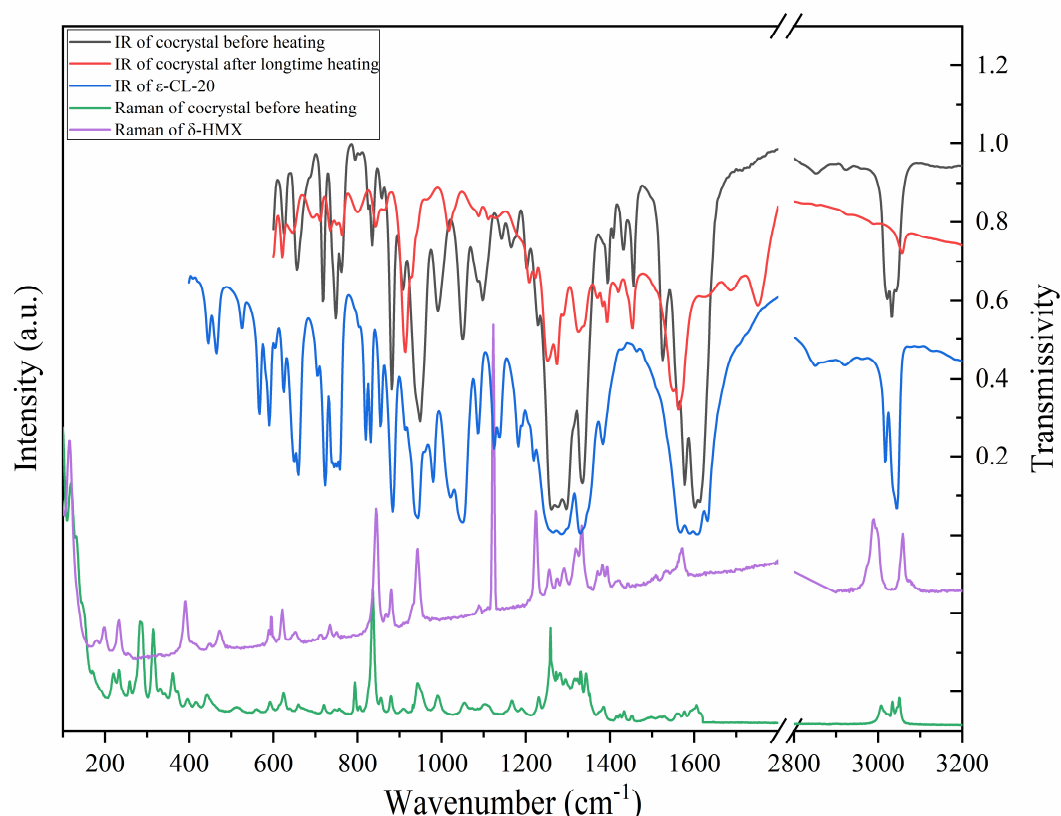

As seen in Fig. S2, Raman and IR spectra for CL-20/HMX cocrystals reveal that there are two sets of vibrational modes from CL-20 and HMX components. After holding at 190 °C for a long time, the vibrational modes of IR for the residual component are the same as those of Raman for  $\delta$ -HMX. This indicates that the CL-20 component completely decomposes and that all residual HMX molecules recrystallize into  $\delta$ -phase HMX.

Figure S3. XRD pattern for CL-20/HMX cocrystals held at 190°C for 1500 minutes refined by the Rietveld method.

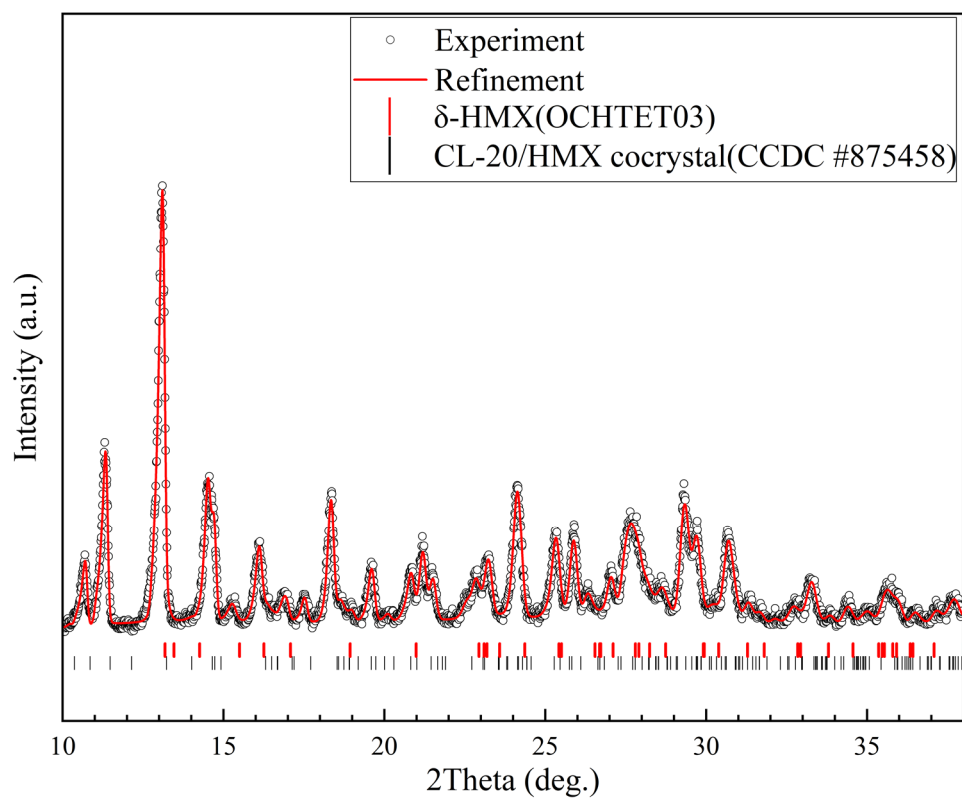

Figure S4. XRD pattern for the samples of CL-20/HMX cocrystals held at 190°C for 1800 minutes refined by the Rietveld method.

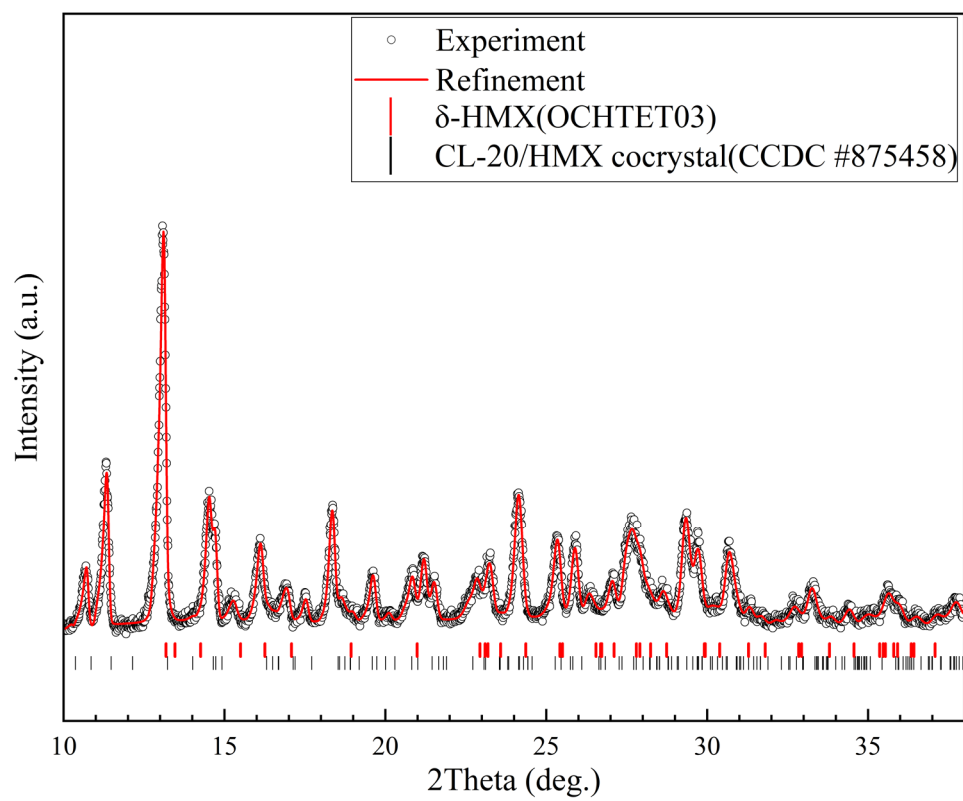

Figure S5. XRD pattern for the samples of CL-20/HMX cocrystals held at 190°C for 2100 minutes refined by the Rietveld method.

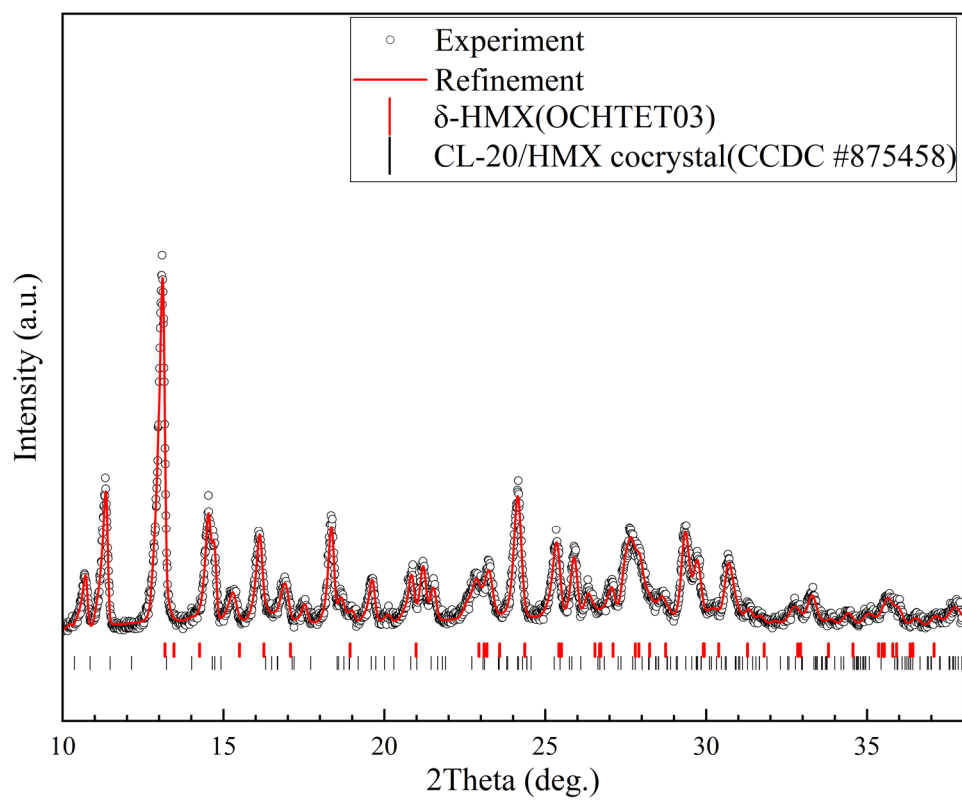

Figure S6. XRD patterns of CL-20/HMX cocrystals held at 190°C for different times

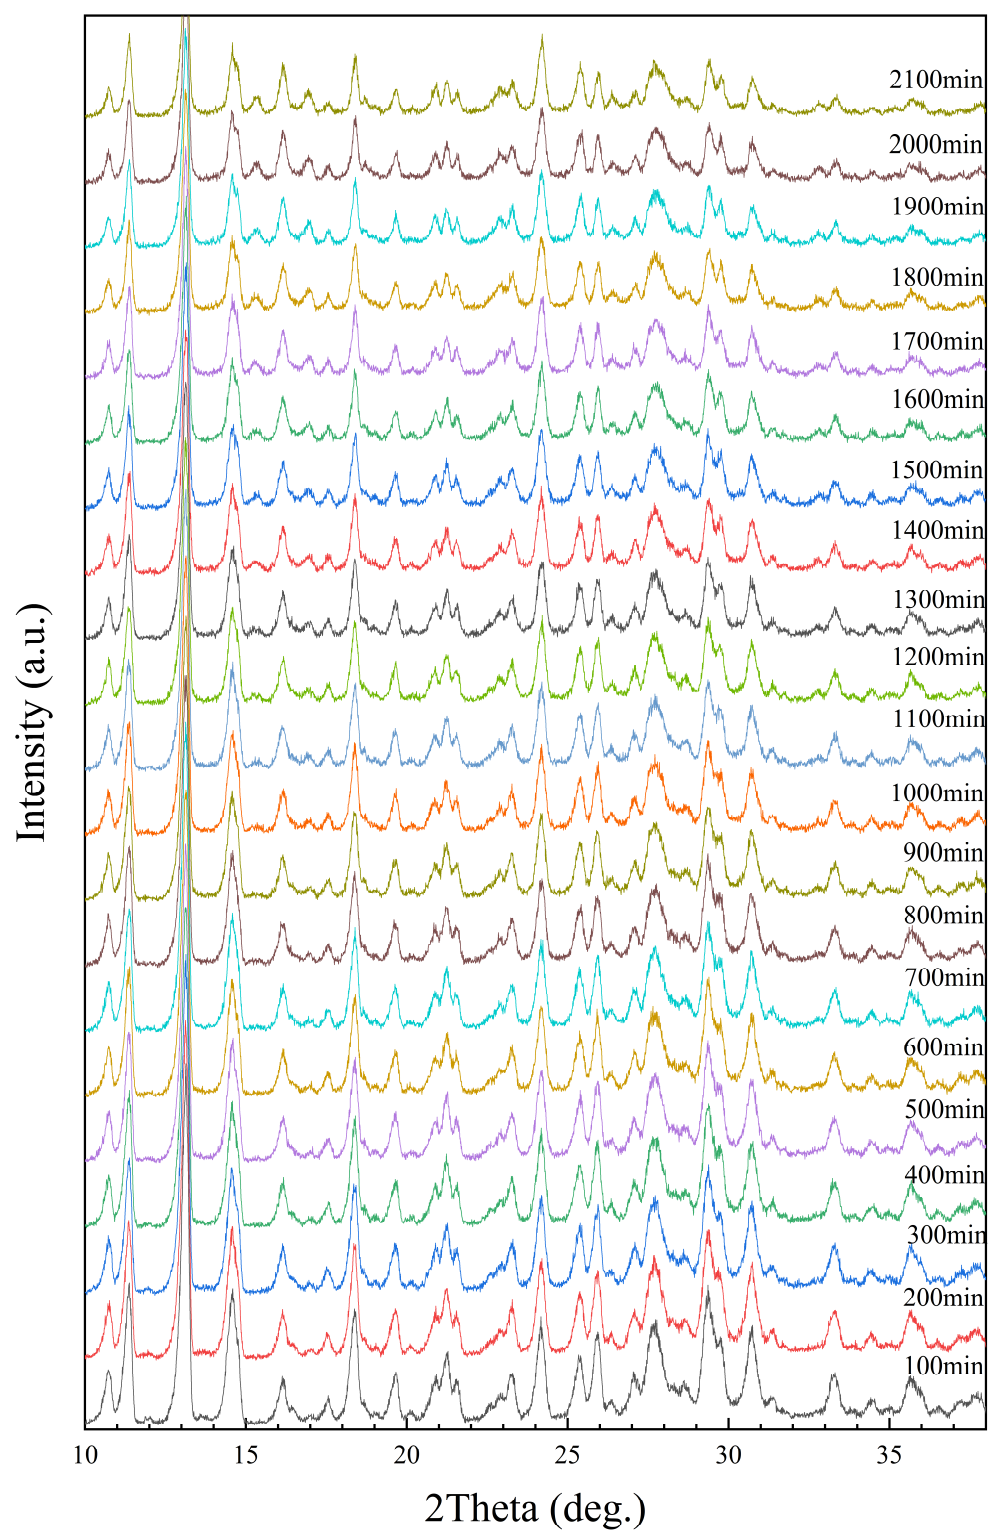

Table S1. The Rietveld refinement results of the XRD patterns for CL-20/HMX cocrystals at different temperatures

| Temperature<br>/°C | a/Å     | b/Å     | c/Å     | β/deg    | O14-H6/Å | O7-H7A/Å | O9-H7A/Å | a*sinβ/Å | σ      | Rwp/%   | Rb/%   |
|--------------------|---------|---------|---------|----------|----------|----------|----------|----------|--------|---------|--------|
| 30                 | 16.5801 | 10.0511 | 12.2947 | 99.9729  | 2.5927   | 2.3279   | 2.3386   | 16.3295  | 2.1820 | 11.7805 | 8.1458 |
| 60                 | 16.6116 | 10.0604 | 12.3106 | 100.0656 | 2.5962   | 2.3331   | 2.3409   | 16.3559  | 2.1698 | 11.6947 | 8.1152 |
| 90                 | 16.6453 | 10.0735 | 12.3299 | 100.1744 | 2.6006   | 2.3388   | 2.3441   | 16.3835  | 2.1855 | 11.7646 | 8.0131 |
| 110                | 16.6710 | 10.0807 | 12.3472 | 100.2261 | 2.6035   | 2.3429   | 2.3459   | 16.4062  | 2.1451 | 11.5187 | 7.8425 |
| 130                | 16.6982 | 10.0903 | 12.3653 | 100.2841 | 2.6068   | 2.3473   | 2.3483   | 16.4300  | 1.9053 | 10.3761 | 7.2030 |
| 140                | 16.7112 | 10.0930 | 12.3731 | 100.3050 | 2.6081   | 2.3493   | 2.3490   | 16.4416  | 2.1087 | 11.2999 | 7.6942 |
| 150                | 16.7222 | 10.0970 | 12.3817 | 100.3301 | 2.6095   | 2.3511   | 2.3500   | 16.4512  | 2.1050 | 11.2789 | 7.8223 |
| 160                | 16.7383 | 10.1025 | 12.3888 | 100.3911 | 2.6114   | 2.3539   | 2.3514   | 16.4638  | 2.0602 | 11.0188 | 7.5627 |
| 170                | 16.7524 | 10.1071 | 12.3979 | 100.4409 | 2.6132   | 2.3564   | 2.3525   | 16.4750  | 2.0621 | 11.0278 | 7.5943 |
| 175                | 16.7596 | 10.1102 | 12.4036 | 100.4723 | 2.6144   | 2.3577   | 2.3533   | 16.4805  | 2.0801 | 11.1026 | 7.7292 |
| 180                | 16.7661 | 10.1117 | 12.4067 | 100.4836 | 2.6149   | 2.3587   | 2.3537   | 16.4862  | 2.0348 | 10.8872 | 7.4499 |
| 185                | 16.7737 | 10.1143 | 12.4104 | 100.5029 | 2.6158   | 2.3599   | 2.3543   | 16.4927  | 2.0021 | 10.7301 | 7.4680 |
| 190                | 16.7827 | 10.1172 | 12.4147 | 100.5139 | 2.6168   | 2.3612   | 2.3550   | 16.5010  | 1.9675 | 10.5612 | 7.2000 |

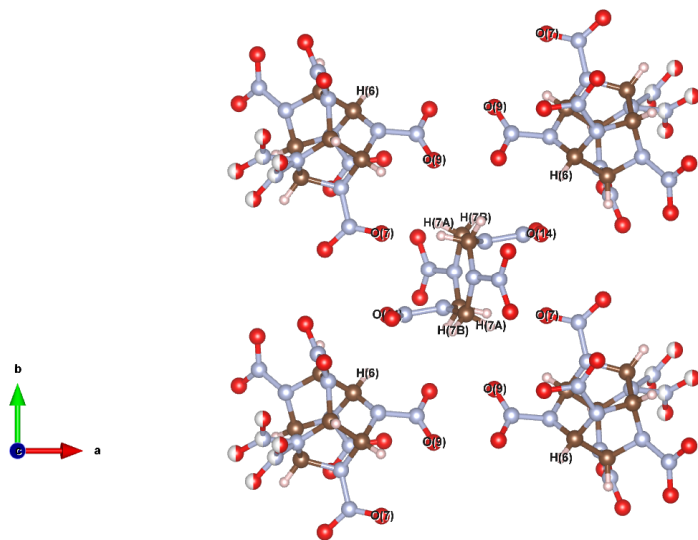



Table S2. The Rietveld refinement results of the XRD patterns for CL-20/HMX cocrystals held at 190°C for different durations

| Time (min) | cocrystal weight (%) | $\delta$ -HMX weight (%) | $\delta$ -HMX: Total HMX (%) | Residual CL-20:Total CL-20 (%) | $\sigma$ | Rwp(%) | Rb(%) |
|------------|----------------------|--------------------------|------------------------------|--------------------------------|----------|--------|-------|
| 300        | 99.630               | 0.370                    | 1.449                        | 98.551                         | 1.264    | 9.902  | 7.122 |
| 600        | 98.680               | 1.320                    | 5.030                        | 94.970                         | 1.314    | 10.132 | 7.403 |
| 900        | 97.020               | 2.980                    | 10.842                       | 89.158                         | 1.179    | 9.789  | 7.048 |
| 1200       | 94.990               | 5.010                    | 17.274                       | 82.726                         | 1.202    | 10.312 | 7.676 |
| 1500       | 92.050               | 7.950                    | 25.481                       | 74.519                         | 1.149    | 9.788  | 7.307 |
| 1800       | 89.480               | 10.520                   | 31.763                       | 68.237                         | 1.158    | 10.010 | 8.398 |
| 2100       | 86.050               | 13.950                   | 39.093                       | 60.907                         | 1.073    | 10.147 | 7.793 |

The cocrystal weight and  $\delta$ -HMX weight are directly obtained from the refinement results.

$\delta$ -HMX: Total HMX is obtained from the following formula of  $m_{\delta}$ .

$$m_{\delta} = \frac{W_{HMX}}{W_{HMX} + W_{Cocrystal} \cdot \frac{M_{HMX}}{M_{Cocrystal}}} \quad S1$$

$W_{HMX}$  is the  $\delta$ -HMX weight.  $W_{Cocrystal}$  is the cocrystal weight.  $M_{HMX}$  is the relative molecular mass of HMX, which is 296.155.  $M_{Cocrystal}$  is the relative molecular mass of the cocrystal, which is 1172.525.

Residual CL-20: Total CL-20 is obtained from the following formula of  $m_{CL-20}$ .

$$m_{CL-20} = \frac{W_{Cocrystal} \cdot \frac{M_{CL-20}}{M_{Cocrystal}}}{W_{HMX} \cdot \frac{2 \cdot M_{CL-20}}{M_{HMX}} + W_{Cocrystal} \cdot \frac{M_{CL-20}}{M_{Cocrystal}}} \quad S2$$

$M_{CL-20}$  is the relative molecular mass of CL-20, which is 438.185.
